# Supplementary material
Source: publisher site journal article supplement (https://www.dovepress.com/article/502139)
Supplement: Supplementary file 1 [file get_supplementary_file.php]

Table S1. Information list of clinical isolates

| **Strain munber** | **Species** | **Isolates resources** | **Resistance phenotype** | **Antimicrobial mechanism** | **Application** |
| --- | --- | --- | --- | --- | --- |
| DC11723 | *E. coli* | Urine | CRECO | *bla*NDM-5 | This study |
| DC10302 | *E. coli* | Urine | CRECO | *bla*NDM-7 | This study |
| DC8439 | *E. coli* | Pus | CRECO | *bla*NDM-9 | This study |
| DC12843 | *E. coli* | Urine | CRECO | *bla*NDM-9 | This study |
| FK6719 | *K. pneumoniae* | Pus | CRKP | *bla*KPC-2 | This study |
| FK6723 | *K. pneumoniae* | Sputum | CRKP | *bla*KPC-2 | This study |
| FK9250 | *K. pneumoniae* | Feces | CRKP | *bla*NDM-5 | This study |
| FK7079 | *K. pneumoniae* | Blood | CRKP | *bla*IMP-8 | This study |
| CG1330 | *E. cloacae* | Drainage fluid | CRECL | *bla*NDM-1 | This study |
| CG1737 | *E. cloacae* | Blood | CRECL | *bla*NDM-5 | This study |
| CG1591 | *E. cloacae* | Urine | CRECL | *bla*IMP | This study |
| CG1640 | *E. cloacae* | Drainage fluid | CRECL | *bla*kpc-2 | This study |
| BM6913 | *A. baumannii* | Sputum | CRAB | *bla*OXA-23, blaOXA-66 | This study |
| BM6927 | *A. baumannii* | Sputum | CRAB | *bla*OXA-66, blaOXA-23 | This study |
| BM6613 | *A. baumannii* | Sputum | CRAB | *bla*NDM-1, blaOXA-23, blaOXA-66 | This study |
| TL7559 | *P. aeruginosa* | Sputum | CRPA | *bla*OXA-486 | This study |
| TL8319 | *P. aeruginosa* | Sputum | CRPA | *bla*KPC | This study |

Notes: CRECO, Carbapenem-resistant *Escherichia coli*; CRKP, Carbapenem-resistant *Klebsiella pneumoniae*; CRECL, Carbapenem-resistant *Enterobacter cloacae*; CRAB, Carbapenem-resistant *Acinetobacter baumannii*; CRPA, Carbapenem-resistant *Pseudomonas aeruginosa*
